# Supplementary material for: Redox-Responsive Lipidic Prodrug Nano-Delivery System Improves Antitumor Effect of Curcumin Derivative C210
Source: MDPI journal article supplement (doi:10.3390/pharmaceutics15051546), 2023-05-19
Supplement: s1 [file s1]

## Supplementary Material

# Redox-Responsive Lipidic Prodrug Nano-Delivery System Improves Antitumor Effect of Curcumin Derivative C210

Xin Guo <sup>1,2</sup>, Min Wu <sup>1,2</sup>, Yanping Deng <sup>1,2,\*</sup>, Yan Liu <sup>1,2</sup>, Yanpeng Liu <sup>1,2</sup> and Jianhua Xu <sup>1,2,\*</sup>

<sup>1</sup> The School of Pharmacy, Fujian Medical University, Fuzhou 350122, China; 17705005241@163.com (X.G.); 18450056606@163.com (M.W.); 13959147061@163.com (Y.L.); 15617186956@163.com (Y.L.)

<sup>2</sup> Fujian Provincial Key Laboratory of Natural Medicine Pharmacology, Fujian Medical University, Fuzhou 350122, China

\* Correspondence: yanpingdeng@fjmu.edu.cn (Y.D.); xjh@fjmu.edu.cn (J.X.)

### Characterization of C210-R-OA prodrugs

**2-methoxy-4-((E)-3-oxo-5-(3,4,5-trimethoxyphenyl)-2-((E)-3-(3,4,5-trimethoxyphenyl) acryloyl)pent-4-en-1-yl)phenyl 2-((2-(((E)-octadec-9-en-1-yl)oxy)-2-oxoethyl)thio)acetate. (C210-S-OA)**

**TOF MS (ES-):** calcd. for [C<sub>55</sub>H<sub>74</sub>O<sub>13</sub>S-H]<sup>-</sup> 973.4772, found 973.4774.

**<sup>1</sup>H NMR** (500 MHz, CDCl<sub>3</sub>) δ 7.69 (d, J = 15.3 Hz, 2H), 6.93 – 6.86 (m, 2H), 6.83 (d, J = 15.3 Hz, 2H), 6.67 (s, 3H), 5.35 (dq, J = 7.9, 4.6, 4.0, 2.1 Hz, 2H), 4.13 (t, J = 6.9 Hz, 2H), 3.98 (s, 2H), 3.93 – 3.82 (m, 19H), 3.77 (s, 3H), 3.62 (d, J = 5.6 Hz, 2H), 3.48 (s, 2H), 2.06 – 1.97 (m, 4H), 1.64 (t, J = 7.3 Hz, 2H), 1.58 (s, 2H), 1.35 – 1.22 (m, 24H), 0.88 (t, J = 6.8 Hz, 3H).

**<sup>13</sup>C NMR** (126 MHz, CDCl<sub>3</sub>) δ 183.56, 169.82, 168.05, 153.44, 151.27, 140.40, 140.20, 138.17, 130.72, 130.01, 129.76, 122.79, 119.92, 111.82, 108.68, 105.92, 105.40, 65.75, 61.00, 56.24, 56.19, 55.90, 33.39, 33.23, 31.91, 31.78, 29.77, 29.72, 29.53, 29.40, 29.32, 29.20, 28.53, 27.22, 27.18, 25.81, 22.69, 14.13.

**2-methoxy-4-((E)-3-oxo-5-(3,4,5-trimethoxyphenyl)-2-((E)-3-(3,4,5-trimethoxyphenyl)acryloyl)pent-4-en-1-yl)phenyl 2-((2-(((E)-octadec-9-en-1-yl)oxy)-2-oxoethyl)disulfaneyl)acetate. (C210-SS-OA)**

**TOF MS (ES-):** calcd. for [C<sub>55</sub>H<sub>74</sub>O<sub>13</sub>S<sub>2</sub>-H]<sup>-</sup> 1005.4493, found 1005.4497.

**<sup>1</sup>H NMR** (500 MHz, CDCl<sub>3</sub>) δ 7.69 (d, J = 15.3 Hz, 2H), 6.93 – 6.80 (m, 4H), 6.67 (s, 3H), 5.39 – 5.30 (m, 2H), 4.13 (dd, J = 7.3, 6.2 Hz, 2H), 3.98 (s, 2H), 3.91 – 3.76 (m, 23H), 3.62 (s, 2H), 2.06 – 1.92 (m, 4H), 1.68 – 1.60 (m, 3H), 1.36 – 1.23 (m, 24H), 0.88 (t, J = 6.9 Hz, 3H).

**<sup>13</sup>C NMR** (126 MHz, CDCl<sub>3</sub>) δ 183.56, 169.38, 167.68, 153.44, 151.33, 142.26, 140.45, 140.19, 138.18, 130.72, 130.00, 129.77, 122.82, 119.93, 119.89, 111.85, 108.69, 105.40, 65.90, 61.02, 61.00, 56.19, 55.90, 55.86, 41.44, 41.03, 31.91, 29.77, 29.73, 29.53, 29.41, 29.33, 29.21, 29.18, 28.51, 27.22, 27.19, 25.81, 22.69, 14.13.

**2-methoxy-4-((E)-3-oxo-5-(3,4,5-trimethoxyphenyl)-2-((E)-3-(3,4,5-trimethoxyphenyl)acryloyl)pent-4-en-1-yl)phenyl ((E)-octadec-9-en-1-yl) glutarate. (C210-C-OA)**

**TOF MS (ES-):** calcd. for  $[\text{C}_{56}\text{H}_{76}\text{O}_{13}\text{-H}]^-$  955.5208, found 955.5206.

**$^1\text{H}$  NMR** (500 MHz,  $\text{CDCl}_3$ )  $\delta$  7.69 (d,  $J = 15.3$  Hz, 2H), 6.93 – 6.80 (m, 4H), 6.67 (s, 3H), 5.40 – 5.27 (m, 2H), 4.08 (t,  $J = 6.8$  Hz, 2H), 3.97 (s, 2H), 3.86 (d,  $J = 6.0$  Hz, 18H), 3.76 (s, 3H), 2.64 (t,  $J = 7.2$  Hz, 2H), 2.46 (t,  $J = 7.4$  Hz, 2H), 2.11 – 2.03 (m, 2H), 2.03 – 1.93 (m, 4H), 1.62 (t,  $J = 7.2$  Hz, 2H), 1.37 – 1.22 (m, 25H), 0.88 (t,  $J = 6.9$  Hz, 3H).

**$^{13}\text{C}$  NMR** (126 MHz,  $\text{CDCl}_3$ )  $\delta$  183.56, 172.99, 171.20, 153.46, 153.43, 151.38, 142.19, 140.16, 140.04, 138.32, 130.74, 129.98, 129.77, 122.92, 119.98, 119.87, 111.74, 108.78, 105.39, 64.70, 64.68, 60.98, 56.22, 56.17, 55.83, 55.80, 33.12, 33.06, 31.90, 31.76, 29.76, 29.72, 29.70, 29.65, 29.52, 29.41, 29.32, 29.23, 29.21, 28.63, 27.21, 27.18, 25.90, 22.68, 20.29, 14.12.



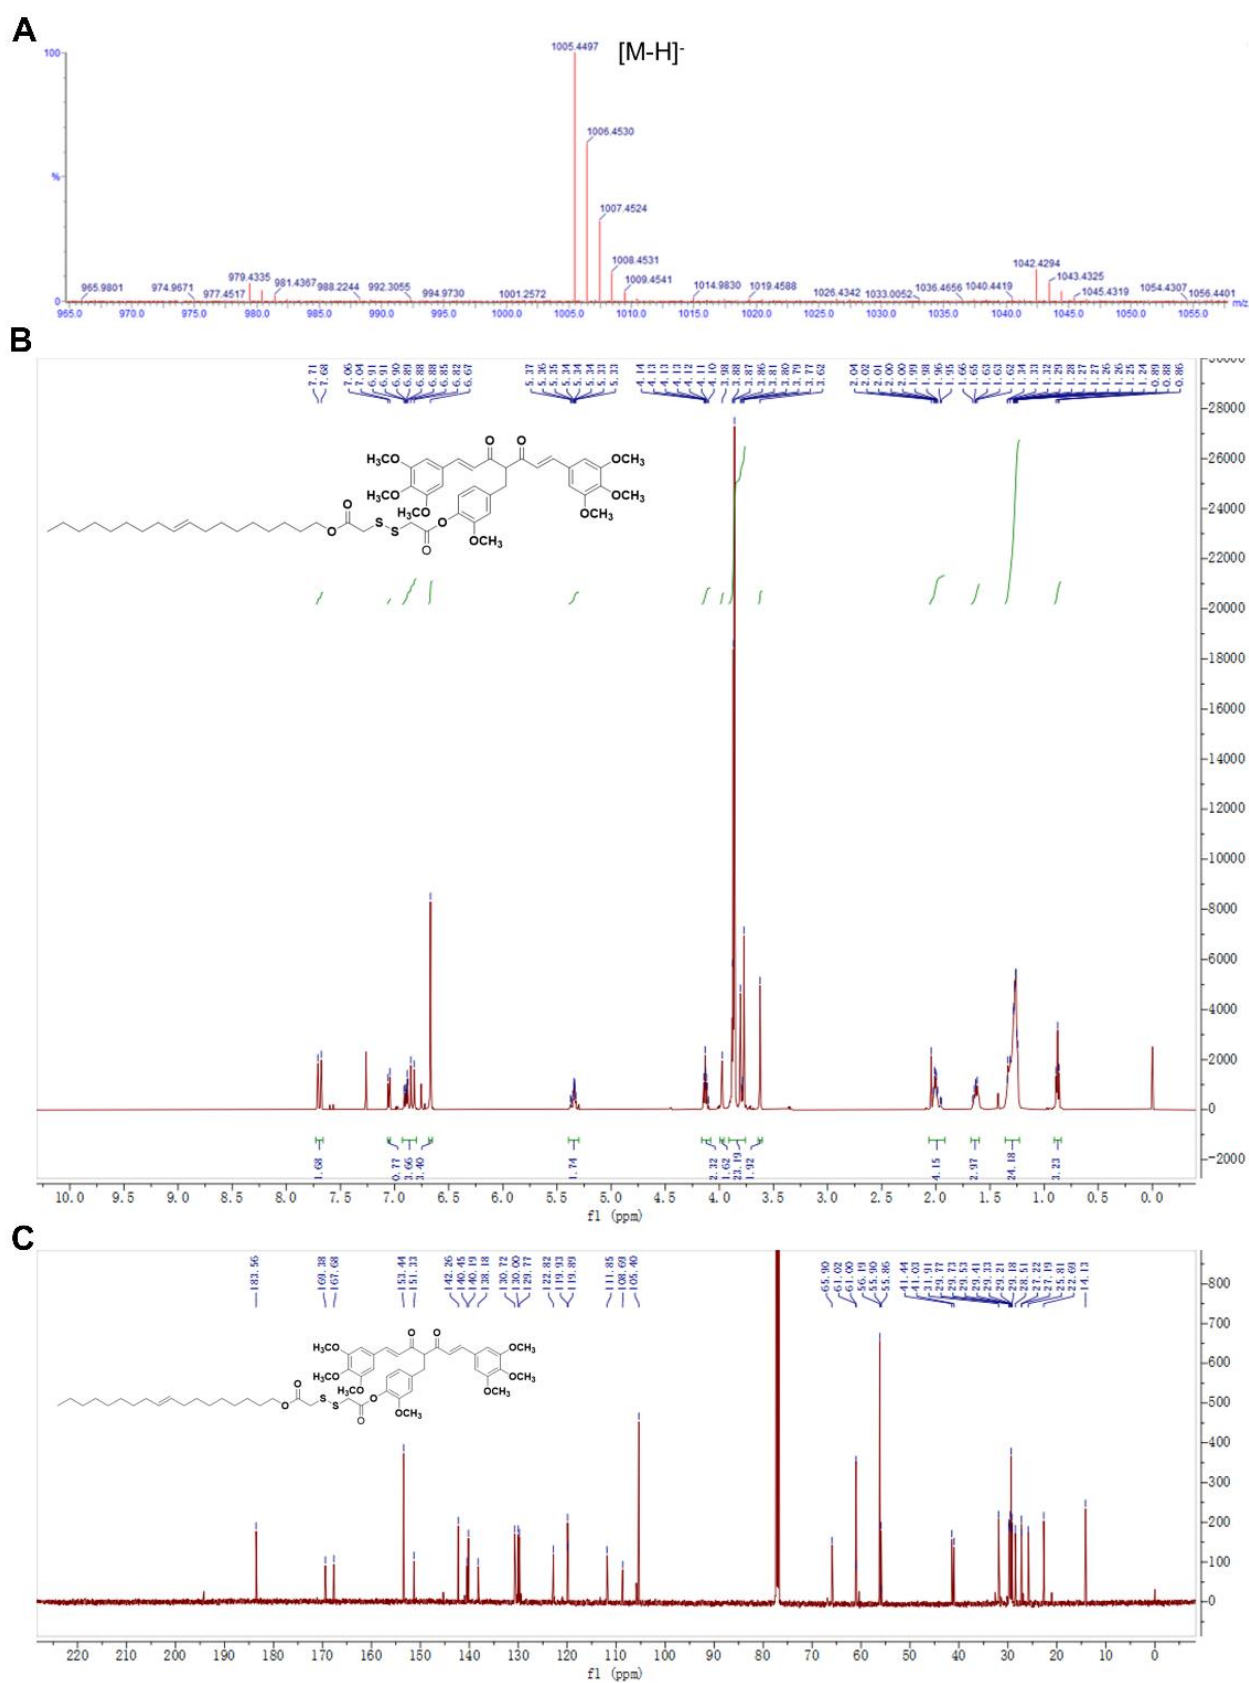

**Figure S2.** Characterization of C210-SS-OA (A) TOF-MS (B)  $^1\text{H}$  NMR (C)  $^{13}\text{C}$  NMR

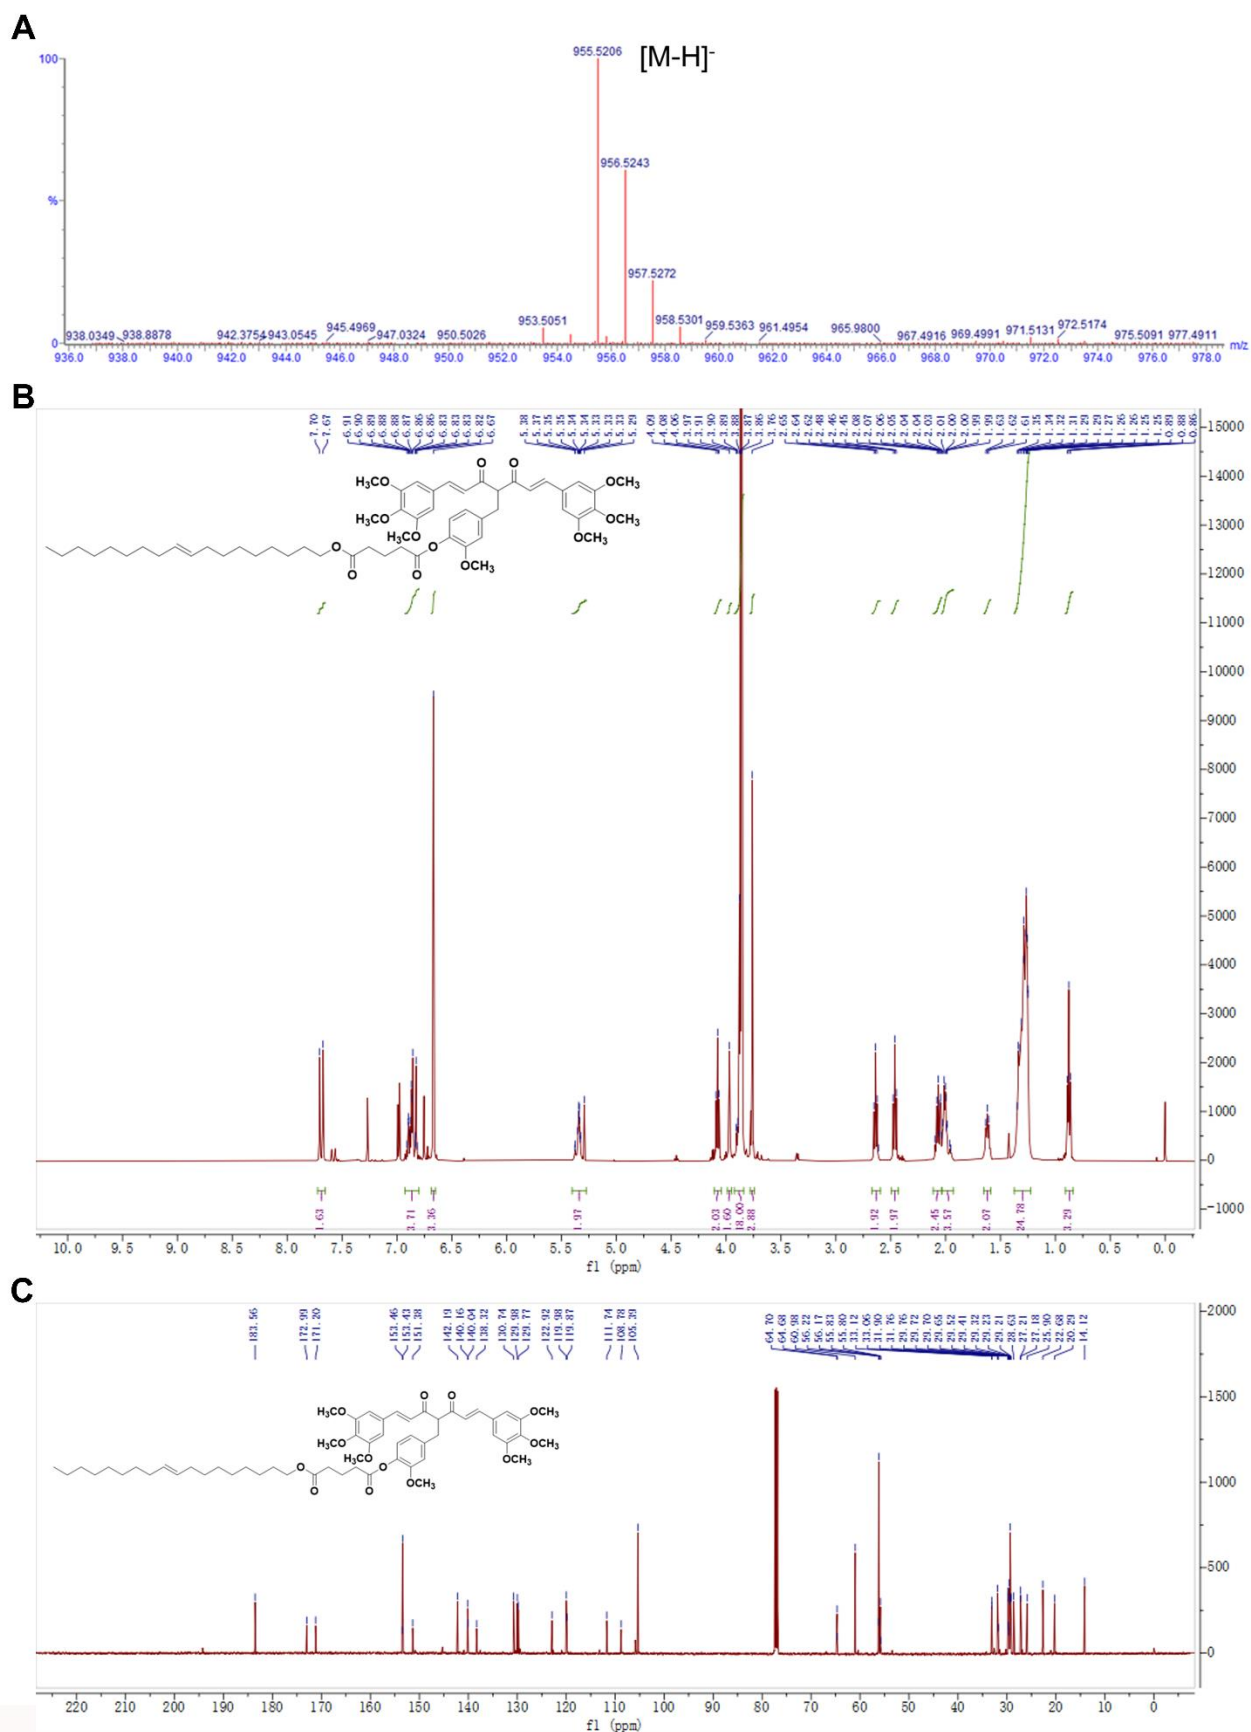

**Figure S3.** Characterization of C210-C-OA (A) TOF-MS (B)  $^1\text{H}$  NMR (C)  $^{13}\text{C}$  NMR

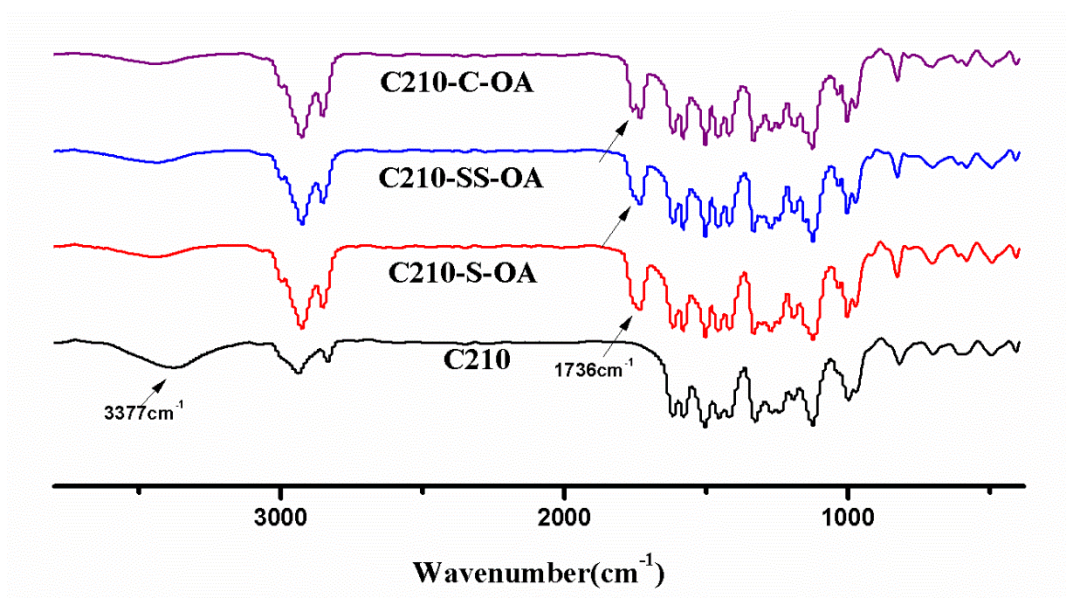

**Figure S4.** Infrared spectra of C210 and its prodrugs

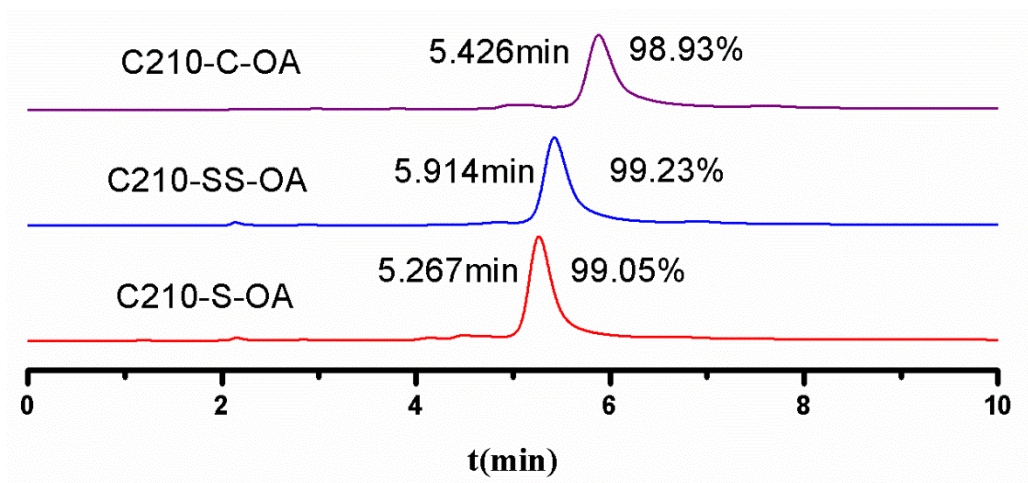

**Figure S5.** Purity of C210 prodrugs using HPLC

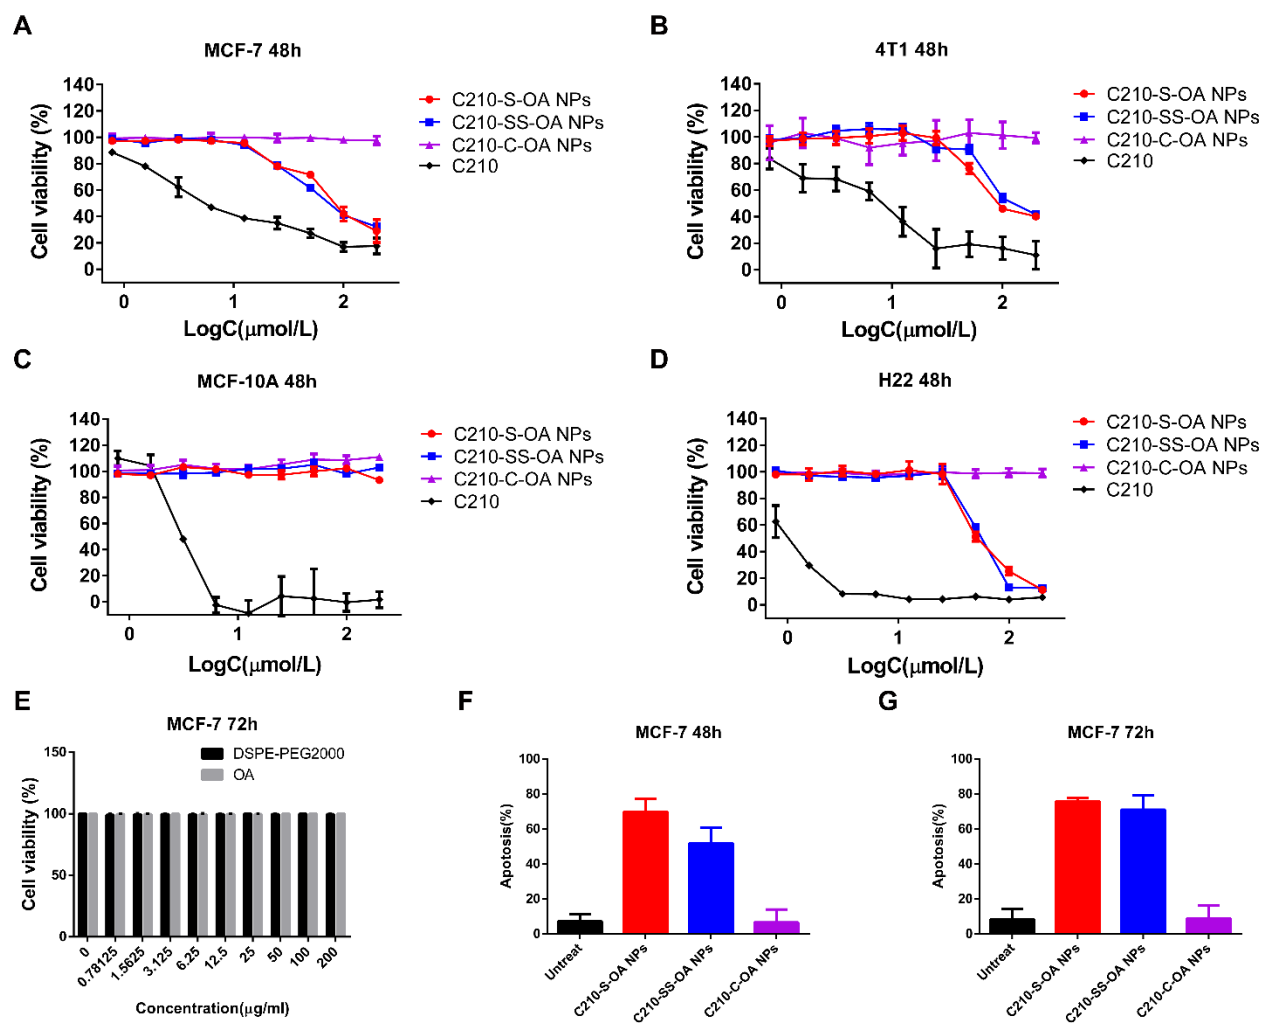

**Figure S6.** Cell viability and apoptosis induction of C210 prodrugs nanoparticles on tumor cell lines. Cell viability of tumor cells treated with the prodrugs nanoparticles and C210 for 48 h. (A) MCF-7 (B) 4T1 (C) MCF-10A (D) H22 (E) Cytotoxicity assay of DSPE-PEG2k and oleyl alcohol. Apoptosis rate of MCF-7 cells after incubation with different formulations. (F)48 h (G) 72h. Data are presented as mean  $\pm$  SD ( $n=3$ ).

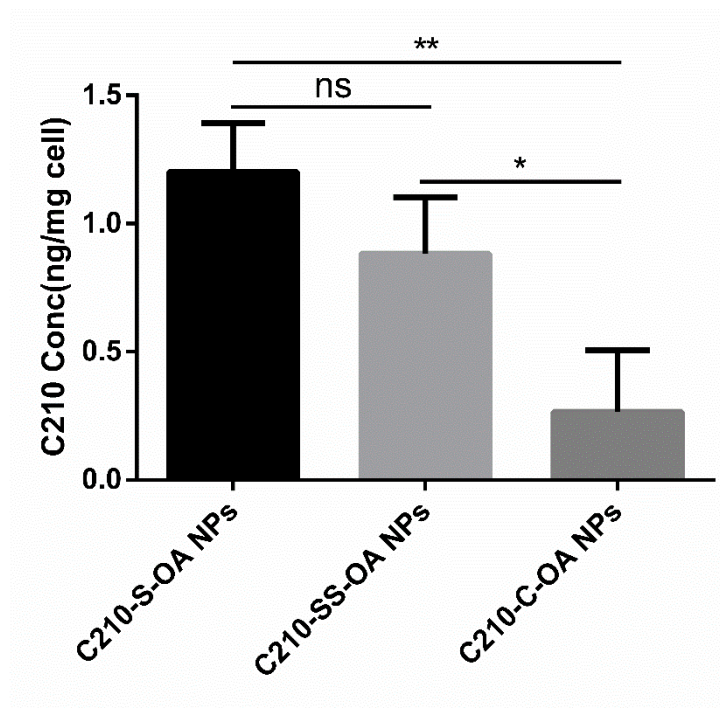

**Figure S7.** C210 release from prodrugs nanoparticles in MCF-7 cells. Data are presented as mean  $\pm$  SD ( $n=3$ ).

\* $p < 0.05$ , \*\* $p < 0.01$ , ns mean not significant.

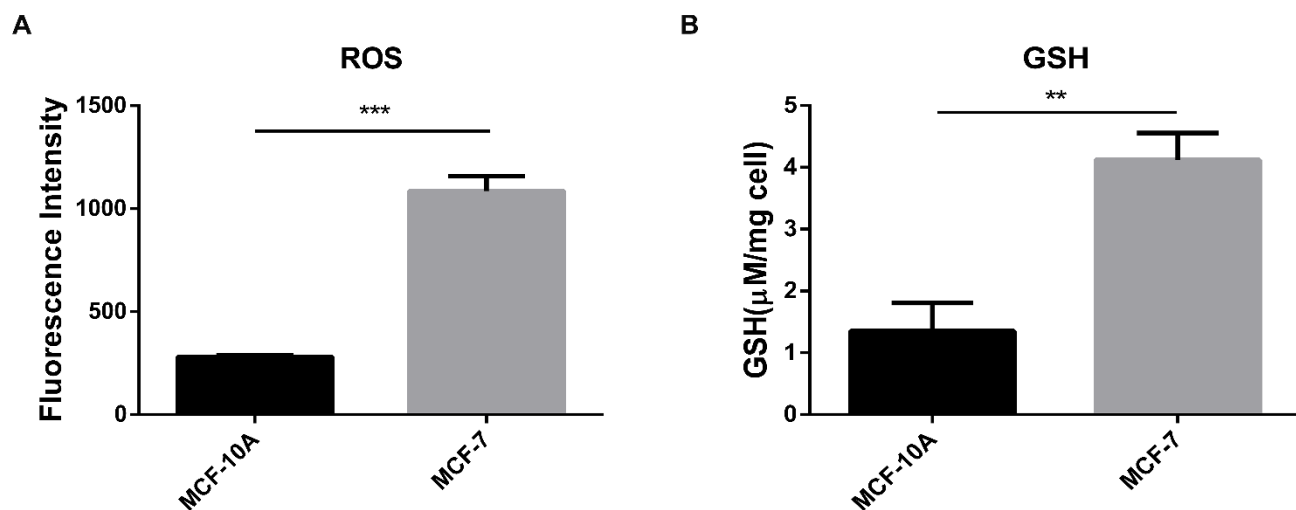

**Figure S8.** Redox levels between normal cells (MCF-10 A) and tumor cells (MCF-7) (A) ROS (B) GSH. Data

are presented as mean  $\pm$  SD ( $n=3$ ). \*\* $p < 0.01$ , \*\*\* $p < 0.001$ .

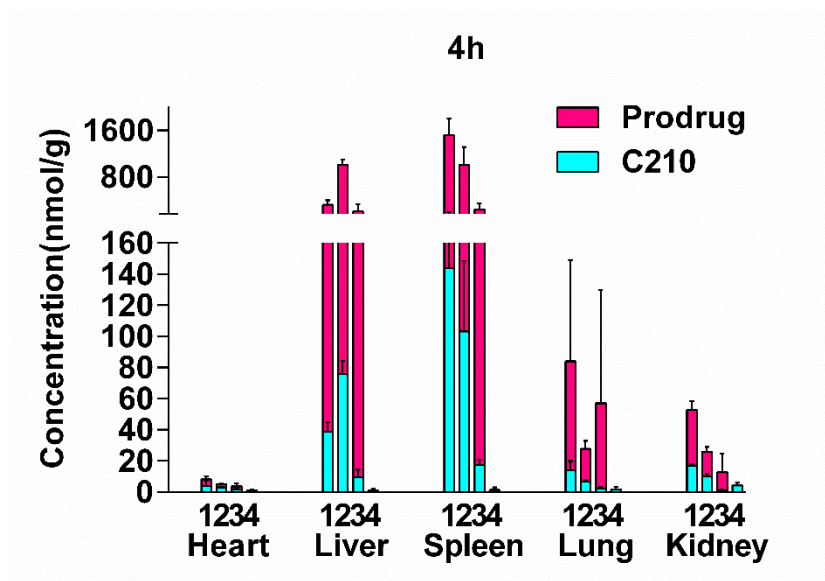

**Figure S9.** The concentration of each C210 prodrug and its corresponding released C210 in tissues (heart, liver, spleen, lung and kidney) at 4 h after intravenous administration at an equivalent dose of 80  $\mu\text{mol/kg}$  C210 using tumor-bearing BALB/C mice.

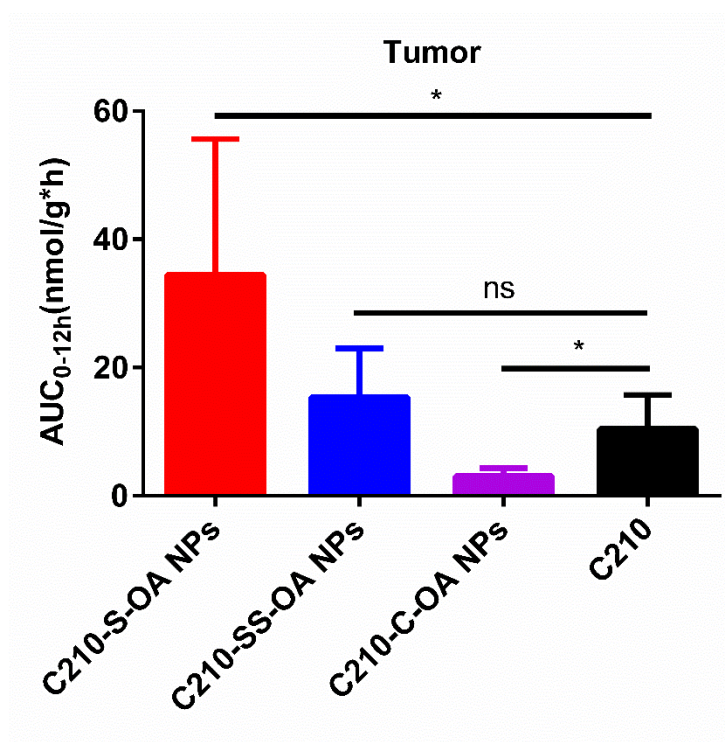

**Figure S10.** AUC<sub>0-12h</sub> of C210 released from C210 prodrugs in tumor tissue after administration. Data are expressed as mean  $\pm$  SD ( $n=3$ ). \* $p < 0.05$ , ns mean not significant.

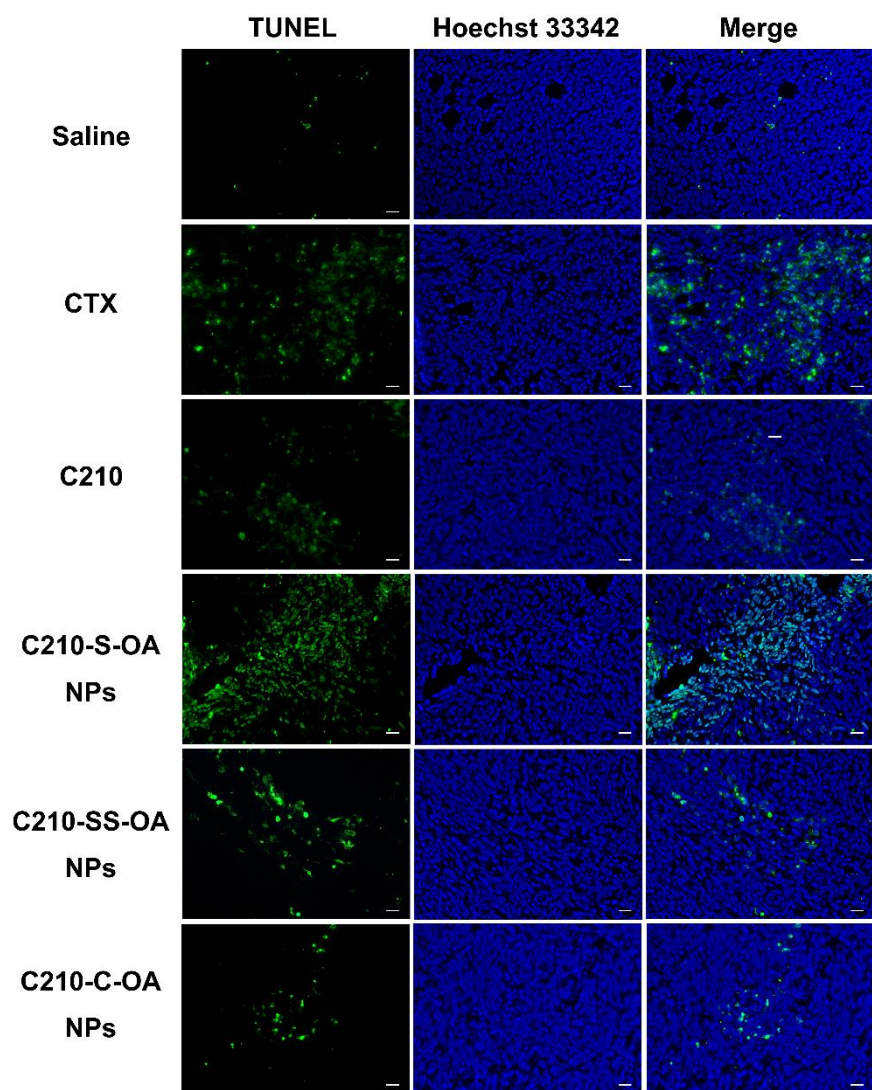

**Figure S11.** 4T1 tumor section TUNEL assay. Scale bars represent 100  $\mu\text{m}$ .

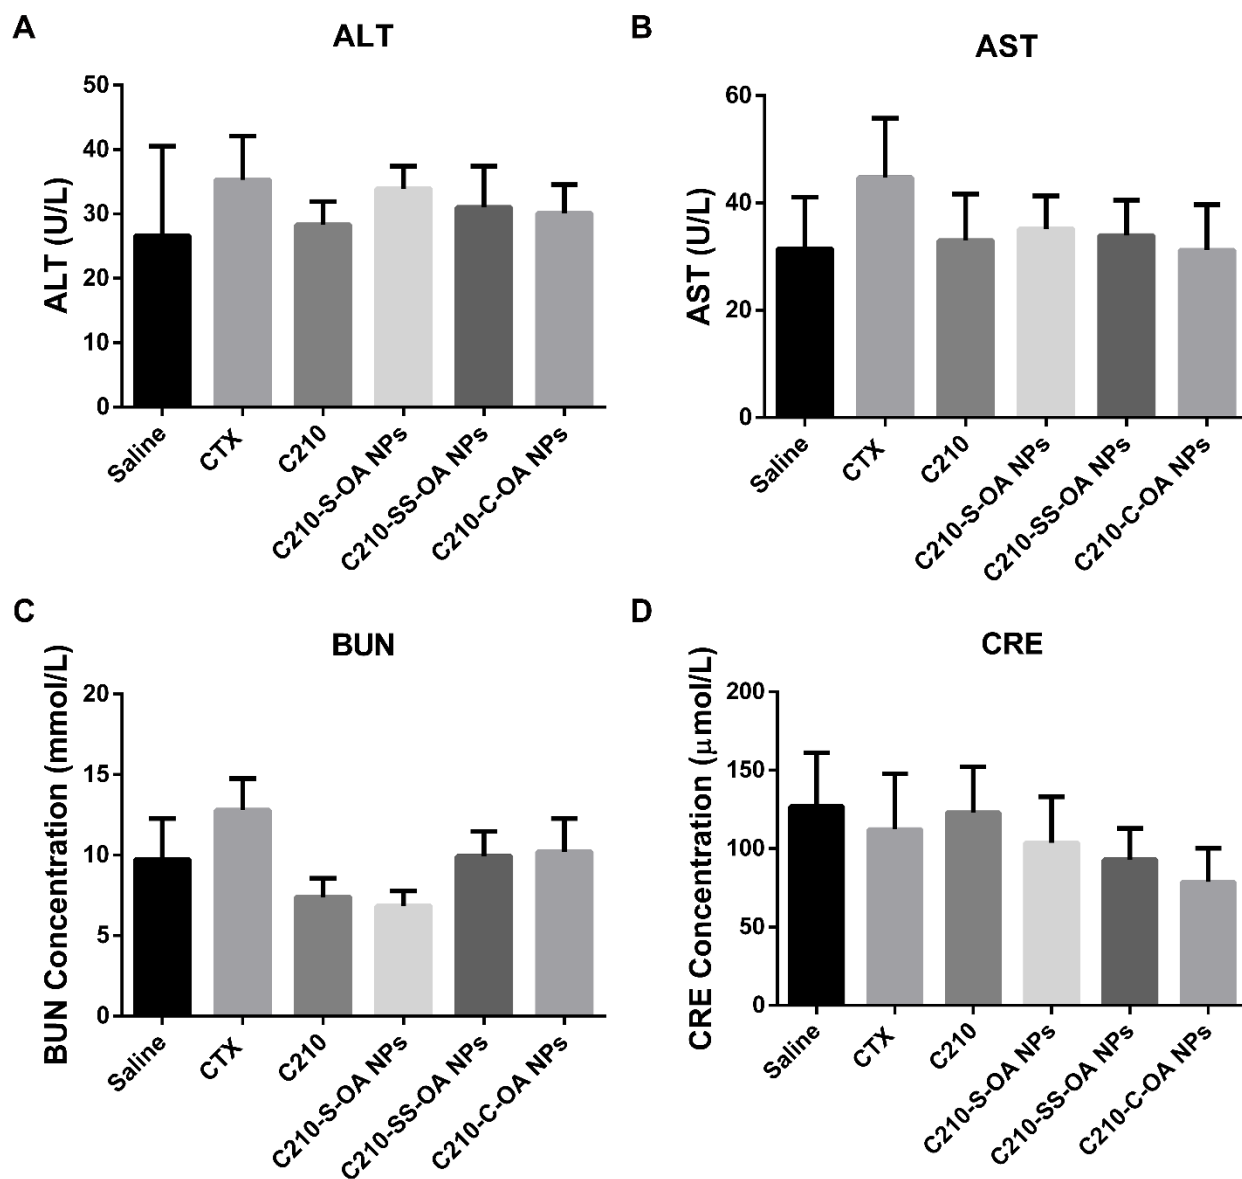

**Figure S12.** Liver and kidney function parameters of the treated mice ( $n=6$ ). (A) ALT: glutamic aminotransferase (B) AST: glutamic aminotransferase (C) BUN: urea nitrogen (D) CRE: creatinine.

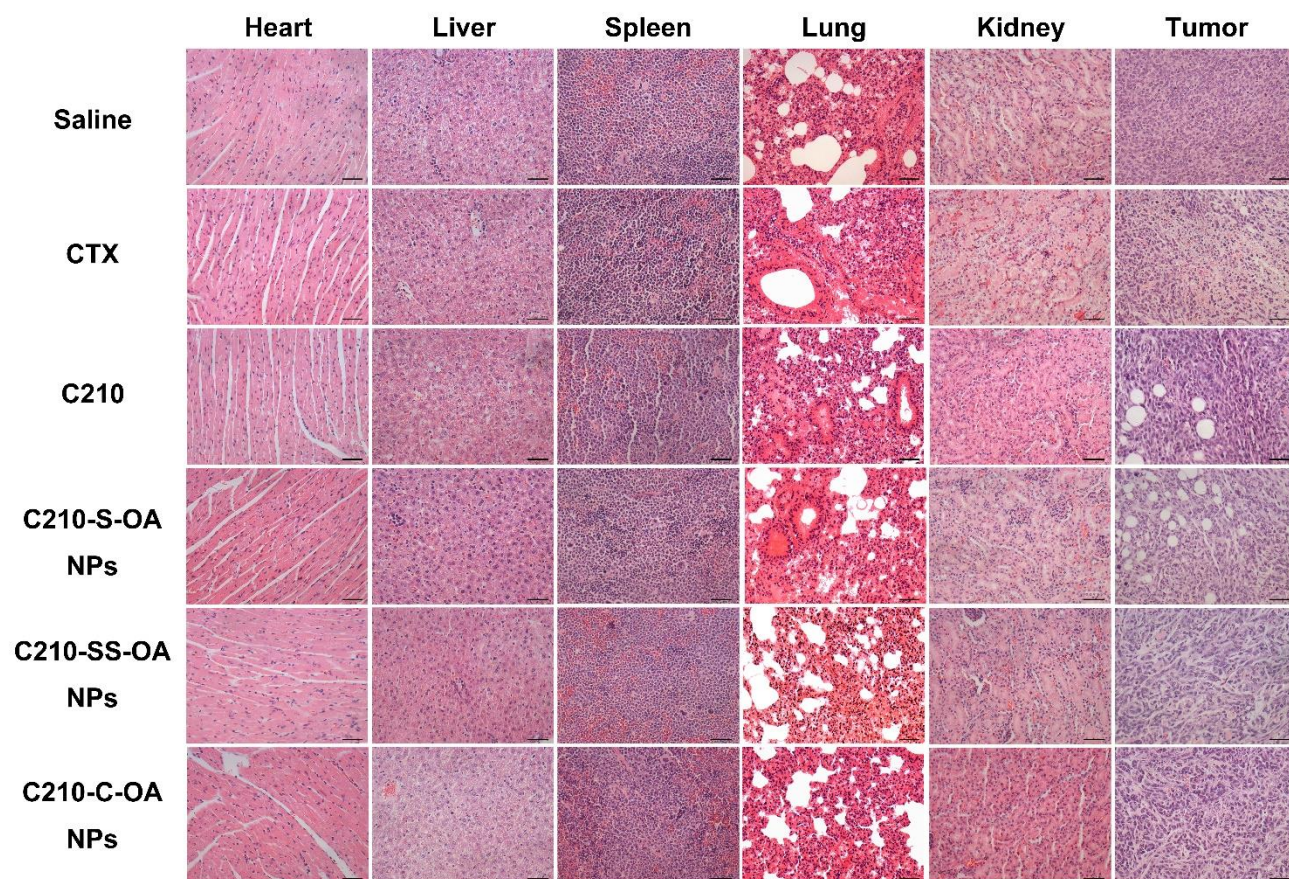

**Figure S13.** HE-stained images of major organ and tumor tissue sections of treated 4T1 tumor-bearing mice.

Scale bars represent 100  $\mu\text{m}$ .

**Table S1.** Characterization of C210 prodrugs nanoparticles ( $n=3$ )

|            | Size(nm)    | PDI       | Zeta potential(mV) | EE(%)      | DL(%)      |
|------------|-------------|-----------|--------------------|------------|------------|
| C210-S-OA  | 128.62±0.84 | 0.10±0.05 | -38.21±1.37        | 92.39±5.52 | 51.63±0.48 |
| C210-SS-OA | 127.08±0.76 | 0.10±0.01 | -35.29±1.66        | 98.72±4.68 | 48.47±0.31 |
| C210-C-OA  | 122.40±1.63 | 0.14±0.04 | -29.76±2.28        | 97.93±1.05 | 49.51±0.31 |

**Table S2.** Drug release kinetic models from prodrugs nanoparticles

| Condition                     | Sample         | Models               | Regression                      | R <sup>2</sup> |
|-------------------------------|----------------|----------------------|---------------------------------|----------------|
| H <sub>2</sub> O <sub>2</sub> | C210-S-OA NPs  | Zero-order kinetics  | Q=1.10t+38.59                   | 0.44           |
|                               |                | First-order kinetics | Q=82.17(1-e <sup>-0.35t</sup> ) | 0.99           |
|                               |                | Higuchi              | Q=17.10t <sup>1/2</sup> +17.86  | 0.80           |
|                               | C210-SS-OA NPs | Zero-order kinetics  | Q=2.10t+26.04                   | 0.56           |
|                               |                | First-order kinetics | Q=64.20(1-e <sup>-0.25t</sup> ) | 0.98           |
|                               |                | Higuchi              | Q=12.96t <sup>1/2</sup> +11.27  | 0.87           |
|                               | C210-C-OA NPs  | Zero-order kinetics  | Q=0.41t+2.70                    | 0.65           |
|                               |                | First-order kinetics | Q=11.30(1-e <sup>-0.14t</sup> ) | 0.87           |
|                               |                | Higuchi              | Q=2.39t <sup>1/2</sup> +0.20    | 0.84           |
| DTT                           | C210-S-OA NPs  | Zero-order kinetics  | Q=3.24t+41.75                   | 0.43           |
|                               |                | First-order kinetics | Q=99.55(1-e <sup>-0.28t</sup> ) | 0.99           |
|                               |                | Higuchi              | Q=21.11t <sup>1/2</sup> +16.20  | 0.79           |
|                               | C210-SS-OA NPs | Zero-order kinetics  | Q=2.22t+65.13                   | 0.09           |
|                               |                | First-order kinetics | Q=97.01(1-e <sup>-1.94t</sup> ) | 0.99           |
|                               |                | Higuchi              | Q=17.35t <sup>1/2</sup> +40.57  | 0.45           |
|                               | C210-C-OA NPs  | Zero-order kinetics  | Q=1.04t+2.32                    | 0.63           |
|                               |                | First-order kinetics | Q=24.48(1-e <sup>-0.09t</sup> ) | 0.80           |
|                               |                | Higuchi              | Q=5.73t <sup>1/2</sup> -3.30    | 0.72           |

**Table S3.** IC<sub>50</sub> values (μmol/l) of C210 and prodrugs nanoparticles against cancer cells (*n*=3).

| Formulations | 4T1        |          | H22      |          |
|--------------|------------|----------|----------|----------|
|              | 48h        | 72h      | 48h      | 72h      |
| C210         | 5.5±1.7    | 2.8±0.5  | 1.5±0.2  | 0.8±0.1  |
| C210-S-OA    | 92.4±1.2   | 84.5±9.7 | 53.5±4.1 | 37.5±8.4 |
| C210-SS-OA   | 126.5±21.5 | 83.8±3.0 | 69.7±7.3 | 43.2±3.2 |
| C210-C-OA    | >200       | >200     | >200     | >200     |

**Table S4.** IC<sub>50</sub> values (μmol/l) of C210 and prodrugs nanoparticles between normal cells and cancer cells.Relative therapeutic index =IC<sub>50</sub> normal /IC<sub>50</sub> cancer (*n*=3).

| Formulations | MCF-10A |         | MCF-7    |           | Relative therapeutic index |
|--------------|---------|---------|----------|-----------|----------------------------|
|              | 48h     | 72h     | 48h      | 72h       | 72h                        |
| C210         | 4.7±0.4 | 1.1±0.2 | 4.5±0.8  | 1.4±0.7   | 0.8                        |
| C210-S-OA    | >200    | >200    | 82.1±1.7 | 52.5±15.1 | >3.8                       |
| C210-SS-OA   | >200    | >200    | 94.8±3.2 | 80.5±21.7 | >2.5                       |
| C210-C-OA    | >200    | >200    | >200     | >200      | -                          |

**Table S5.** Pharmacokinetic parameters of C210 and C210 released from prodrugs nanoparticles. \*\*\**p*<0.001 vs. C210 group (*n*=3).

| Formulations   | AUC <sub>0-12h</sub> | MRT <sub>0-12h</sub> | T <sub>1/2</sub> |
|----------------|----------------------|----------------------|------------------|
|                | (μmol/l*h)           | (h)                  | (h)              |
| C210           | 74.51±25.50          | 0.44±0.15            | 1.17±0.76        |
| C210-S-OA NPs  | 734.29±106.39***     | 3.21±0.31***         | 1.58±0.51        |
| C210-SS-OA NPs | 713.72±159.55***     | 2.97±0.31***         | 1.79±0.40        |
| C210-C-OA NPs  | 44.99±18.83          | 2.50±0.46***         | 1.32±0.40        |

**Table S6.** Pharmacokinetic parameters of C210 prodrugs (*n*=3).

| <b>Formulations</b> | <b>AUC<sub>0-12h</sub></b> | <b>MRT<sub>0-12h</sub></b> | <b>T<sub>1/2</sub></b> |
|---------------------|----------------------------|----------------------------|------------------------|
|                     | <b>(μmol/l*h)</b>          | <b>(h)</b>                 | <b>(h)</b>             |
| C210-S-OA NPs       | 479.95±70.85               | 2.94±0.42                  | 1.94±0.32              |
| C210-SS-OA NPs      | 370.02±155.86              | 3.14±0.32                  | 2.17±1.12              |
| C210-C-OA NPs       | 508.50±202.57              | 2.89±0.84                  | 2.37±1.15              |
